# Supplementary material
Source: PubMed Central journal article supplement (PMC5069755)
Supplement: sys001160034st9.pdf [file sys001160034st9.pdf]

**Table S1. Study design and metabolomic data description for all analyzed datasets.**

| Dataset        | Organism and site       | Study type                         | Data used                             | # samples         | # subjects        | # metabolites | # KEGG metabolites | # analyzed metabolites | Ref      |
|----------------|-------------------------|------------------------------------|---------------------------------------|-------------------|-------------------|---------------|--------------------|------------------------|----------|
| 1              | Human, vagina           | Case-control (BV)                  | 16S qPCR, metabolomics                | 67<br>(42/25/0)*  | 59<br>(40/23/0)*  | 279           | 197                | 82                     | (22)     |
| 2              | Human, vagina           | Case-control (BV) <sup>a</sup>     | 16S sequencing, targeted metabolomics | 70<br>(40/20/10)* | 70<br>(40/20/10)* | 101           | 96                 | 58                     | (22)     |
| 3              | Mouse, gut              | Perturbation (antibiotics)         | 16S sequencing, metabolomics          | 29                |                   | 480           | 297                | 116                    | (23)     |
| 4              | Human, gut (fecal)      | Case-control (CD) <sup>b</sup>     | Shotgun sequencing, metabolomics      | 12                |                   | 1113          | 136                | 31                     | (15, 40) |
| <i>E. coli</i> | <i>E. coli</i> cultures | Perturbation (stress) <sup>c</sup> | Microarray, metabolomics              | 28                |                   | 196           | 87                 | 42                     | (44)     |

\* (BV+/BV-/intermediate)

<sup>a</sup> Bacterial vaginosis with intermediate samples

<sup>b</sup> Twins discordant and concordant for Crohn's disease

<sup>c</sup> *E. coli* cultures treated with heat, cold, oxidative stress, glucose-lactose shift
